# Supplementary material for: Evaluation of the Age, Biomarkers, and Clinical History–Bleeding Risk Score in Patients With Atrial Fibrillation With Combined Aspirin and Anticoagulation Therapy Enrolled in the ARISTOTLE and RE-LY Trials
Source: PubMed Central journal article supplement (PMC7495236; doi:10.1001/jamanetworkopen.2020.15943), 2020-09-16
Supplement: jamanetwopen-e2015943-s001.pdf [file jamanetwopen-e2015943-s001.pdf]

## Supplementary Online Content

Hijazi Z, Oldgren J, Lindbäck J, et al. Evaluation of the age, biomarkers, and clinical history–bleeding risk score in patients with atrial fibrillation with combined aspirin and anticoagulation therapy enrolled in the ARISTOTLE and RE-LY trials. *JAMA Network Open*. 2020;3(9):e2015943. doi:10.1001/jamanetworkopen.2020.15943

**eFigure.** Relative Hazard of Major Bleeding Comparing Patients With Oral Anticoagulation on Aspirin (ASA) With Patients Not on ASA in ARISTOTLE and RE-LY by Estimated HAS-BLED Risk

**eTable.** ANOVA Table for the Cox Regression Model Including Aspirin, the ABC-Bleeding and HAS-BLED Scores, and the Interaction Between Aspirin and the Respective Bleeding Risk Scores

This supplementary material has been provided by the authors to give readers additional information about their work.

**eFigure.** Relative Hazard of Major Bleeding Comparing Patients With Oral Anticoagulation on Aspirin (ASA) With Patients Not on ASA in ARISTOTLE and RE-LY by Estimated HAS-BLED Risk

A. The relative hazard of major bleeding comparing patients with oral anticoagulation on aspirin (ASA) with patients not on ASA in ARISTOTLE by estimated HAS-BLED risk

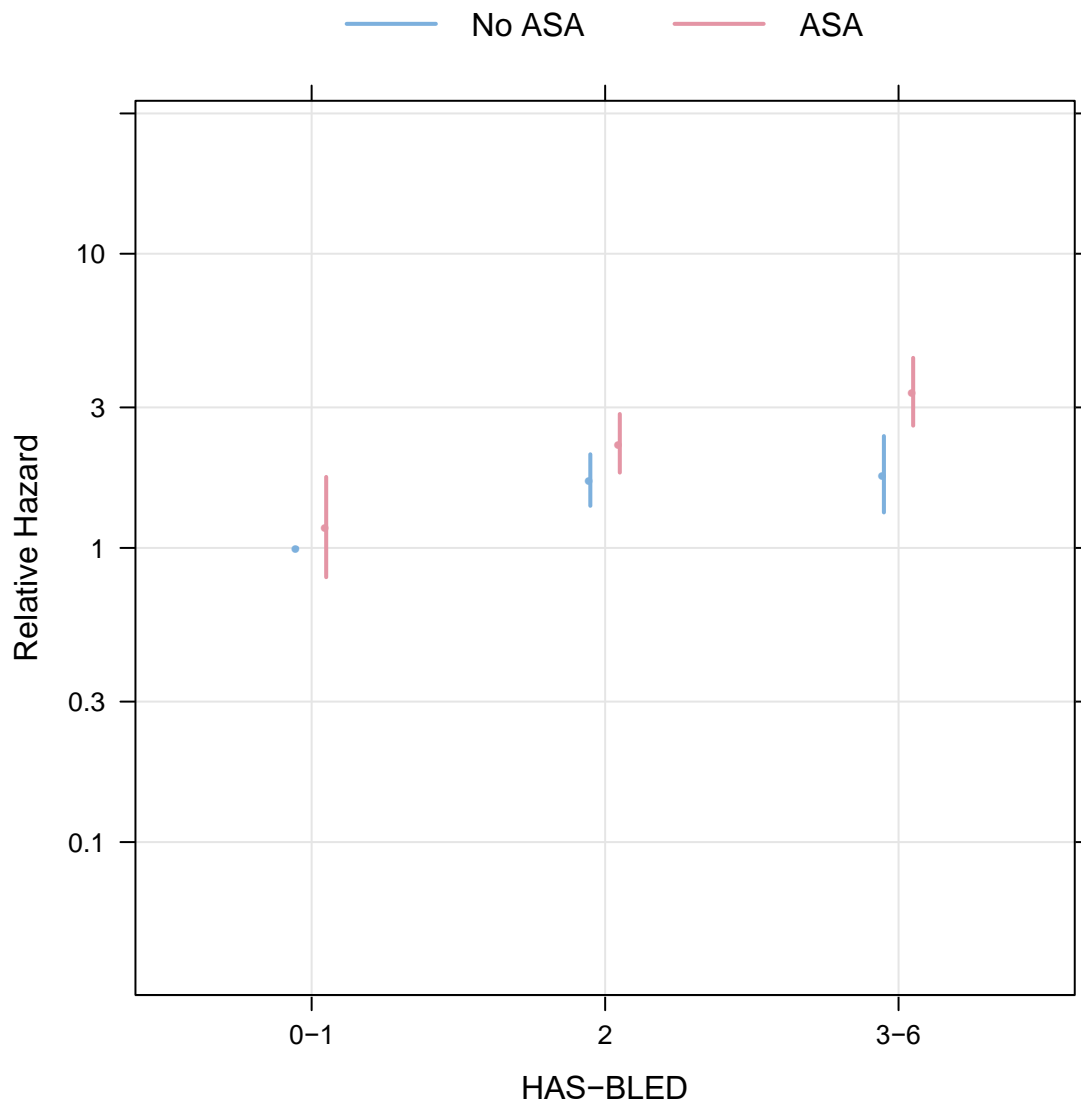

B. The relative hazard of major bleeding comparing patients with oral anticoagulation on aspirin (ASA) with patients not on ASA in RE-LY by estimated HAS-BLED risk

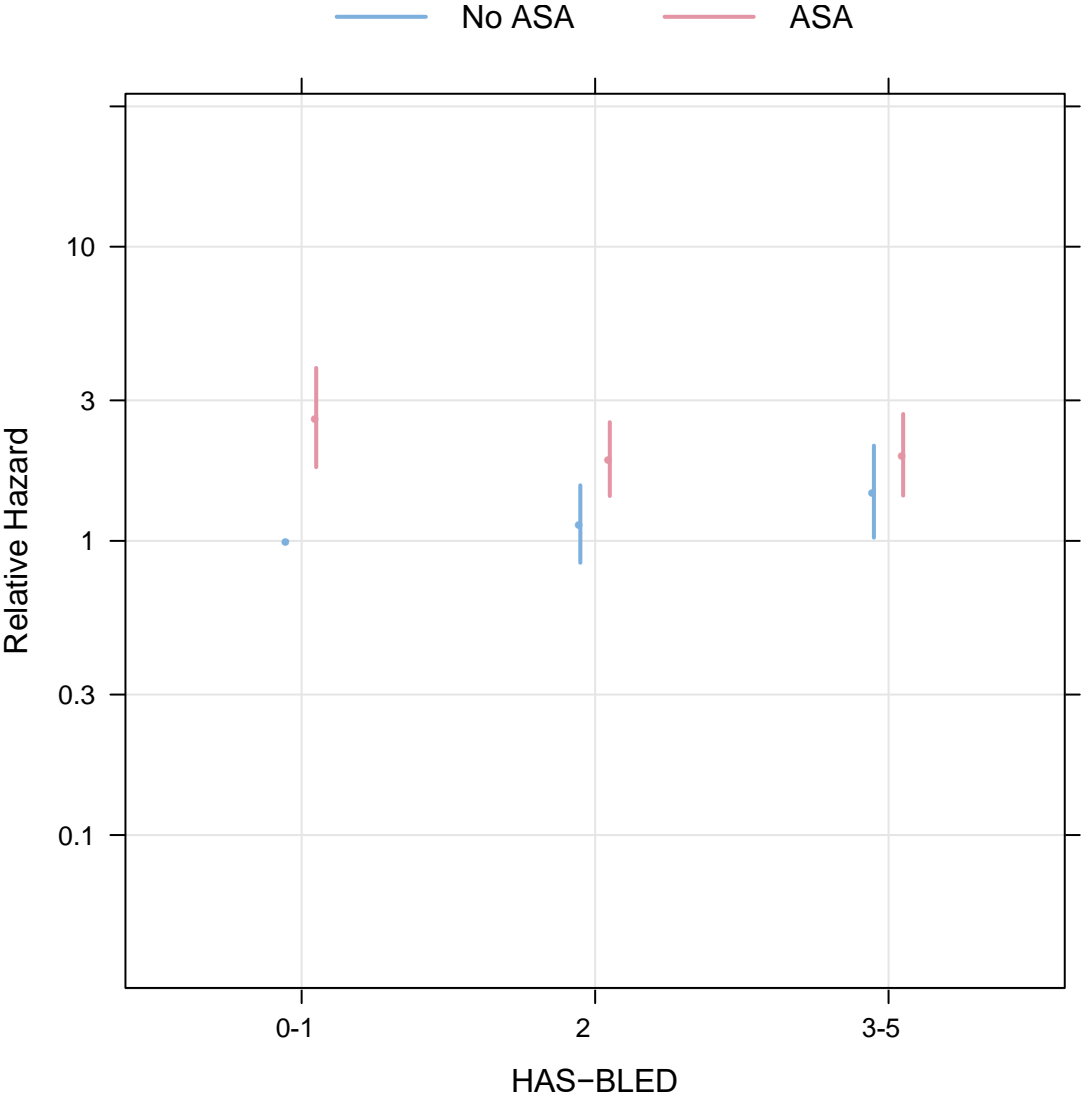

**eTable.** ANOVA Table for the Cox Regression Model Including Aspirin, the ABC-Bleeding and HAS-BLED Scores, and the Interaction Between Aspirin and the Respective Bleeding Risk Scores

A. ARISTOTLE

| Factor                                                  | Chi-Square | d.f. | <i>P</i> |
|---------------------------------------------------------|------------|------|----------|
| On aspirin (Factor+Higher Order Factors)                | 26.41      | 3    | <.0001   |
| All Interactions                                        | 3.67       | 2    | 0.1596   |
| ABC-bleeding (Factor+Higher Order Factors)              | 177.22     | 4    | <.0001   |
| All Interactions                                        | 3.57       | 1    | 0.0590   |
| Nonlinear                                               | 66.87      | 2    | <.0001   |
| HAS-BLED (Factor+Higher Order Factors)                  | 4.51       | 2    | 0.1047   |
| All Interactions                                        | 0.03       | 1    | 0.8726   |
| On aspirin * ABC-bleeding (Factor+Higher Order Factors) | 3.57       | 1    | 0.0590   |
| On aspirin * HAS-BLED (Factor+Higher Order Factors)     | 0.03       | 1    | 0.8726   |
| TOTAL INTERACTION                                       | 3.67       | 2    | 0.1596   |
| TOTAL NONLINEAR + INTERACTION                           | 68.45      | 4    | <.0001   |
| TOTAL                                                   | 289.47     | 7    | <.0001   |

B. RE-LY:

| Factor                                               | Chi-Square | d.f. | <i>P</i> |
|------------------------------------------------------|------------|------|----------|
| Aspirin (Factor+Higher Order Factors)                | 35.32      | 4    | <.0001   |
| All Interactions                                     | 8.42       | 3    | 0.0381   |
| HAS-BLED (Factor+Higher Order Factors)               | 7.33       | 4    | 0.1195   |
| All Interactions                                     | 6.30       | 2    | 0.0430   |
| ABC-bleeding (Factor+Higher Order Factors)           | 186.79     | 4    | <.0001   |
| All Interactions                                     | 0.51       | 1    | 0.4754   |
| Nonlinear                                            | 86.26      | 2    | <.0001   |
| Aspirin * ABC-bleeding (Factor+Higher Order Factors) | 0.51       | 1    | 0.4754   |
| Aspirin * HAS-BLED (Factor+Higher Order Factors)     | 6.30       | 2    | 0.0430   |
| TOTAL INTERACTION                                    | 8.42       | 3    | 0.0381   |
| TOTAL NONLINEAR + INTERACTION                        | 93.38      | 5    | <.0001   |
| TOTAL                                                | 266.31     | 9    | <.0001   |
